# Supplementary material for: A Narrative Review on Strategies for the Reversion of Prediabetes to Normoglycemia: Food Pyramid, Physical Activity, and Self-Monitoring Innovative Glucose Devices
Source: MDPI journal article supplement (doi:10.3390/nu15234943), 2023-11-28
Supplement: s1 [file s1]

| Authors            | Type of study                   | Population characteristics                                                                | Type of intervention                                                                                                                         | Duration | End point                                                                                             | Results                                                                                                                                                                                      | Conclusion                                                                      | Strength of evidence |
|--------------------|---------------------------------|-------------------------------------------------------------------------------------------|----------------------------------------------------------------------------------------------------------------------------------------------|----------|-------------------------------------------------------------------------------------------------------|----------------------------------------------------------------------------------------------------------------------------------------------------------------------------------------------|---------------------------------------------------------------------------------|----------------------|
| Gulati et al, 2022 | RCT with two parallel groups    | 66 participants with prediabetes in the range of 18-60 years                              | The effects of a dose of 20g of almonds before lunch and dinner was evaluated                                                                | 3 months | To evaluate the risk of prediabetes and DM2                                                           | The intake of almonds before main meals would therefore seem to help in the prevention of the evolution from prediabetes to frank diabetes.                                                  | Eating almonds before meals can help reduce the risk of DM2 and IFG             | High                 |
| Cascas et al, 2011 | Randomized parallel group study | 50 patients with metabolic syndrome were instructed to consume 30g of dried fruit per day | People were instructed to consume 30g of dried fruit per day (15g walnuts, 7.5g almonds, 7.5g hazelnuts)                                     | 12-week  | To evaluate the effects of nuts in inflammatory markerkers and HOMA index                             | The nut group reduced fasting insulin by 2.60 $\mu$ U/mL (95% CI, -4.62 to -0.59) and HOMA by 0.72 (-1.28 to -0.16) (P<0.05) . Among inflammatory markers, IL6 levels decreased by 1.1 ng/ml | Eating nuts seems to reduce HOMA index and inflammatory markers                 | High                 |
| Hou et al, 2018    | RCT                             | 32 patients with DM2                                                                      | 60 g/day peanuts for men and 50 g/day for women in the Peanut group, and 55 g/day almonds for men and 45 g/day for women in the Almond group | 3-month  | To evaluate the relationship with peanuts and almonds in the diet and BMI and glicometabolic patterns | There were significant pre-post changes in fasting and postprandial blood glucose (p < 0.05). The glycated value was reduced in the almond group (p < 0.05).                                 | Introducing in the diet peanuts and almonds can improve glicometabolic patterns | High                 |

|                  |                                 |                                                          |                                                                                                                                                               |           |                                                                                           |                                                                                                                                                                                                                                                                                                                            |                                                                                                             |      |
|------------------|---------------------------------|----------------------------------------------------------|---------------------------------------------------------------------------------------------------------------------------------------------------------------|-----------|-------------------------------------------------------------------------------------------|----------------------------------------------------------------------------------------------------------------------------------------------------------------------------------------------------------------------------------------------------------------------------------------------------------------------------|-------------------------------------------------------------------------------------------------------------|------|
| Wien et al, 2010 | Randomized parallel group study | 65 people with prediabetes                               | Almond intake was approximately 20% of the daily caloric intake, approximately 60g/day.                                                                       | 16 weeks  | To evaluate the relationship with almonds in the diet and BMI and glicometabolic patterns | The intervention group showed both a reduction in insulin HOMA IR and HOMA 2B compared with the control group without almonds.                                                                                                                                                                                             | Introducing in the diet almonds can improve glicometabolic patterns and can help reduces insulin resistance | High |
| Lu et al, 2021   | Randomized crossover study      | Ten overweight Chinese men with a mean age of 47.9 years | Ingestion of a nut-based, high-protein snack bar or an isocaloric bar contain more carbohydrates. The bar used contained a caloric quantity of about 1000 KJ. | 0-120 min | Evaluate the glicemic response in a 2h window with two different bars                     | In the patients who received the bar rich in dried fruit, there was a reduction in blood sugar ( $P < 0.05$ ) in the 30-120 minutes after ingestion of both the bar alone and the bar associated with 50g of white bread ( a food that normally raises blood sugar), with an area under the glycemic curve 10 times lower. | The nuts bar can reduce post prandial glycemia                                                              | High |
