# Supplementary material for: A Narrative Review on Strategies for the Reversion of Prediabetes to Normoglycemia: Food Pyramid, Physical Activity, and Self-Monitoring Innovative Glucose Devices
Source: MDPI journal article supplement (doi:10.3390/nu15234943), 2023-11-28
Supplement: s1 [file s1]

| Authors           | Type of study                                | Number of studies                  | Subjects (total)                                               | End point                                                                                                      | Result                                                                                                                                                                                                                                                                                                                                                                                                                                                                                         | Conclusion                                                                                         | Strenght of evidence |
|-------------------|----------------------------------------------|------------------------------------|----------------------------------------------------------------|----------------------------------------------------------------------------------------------------------------|------------------------------------------------------------------------------------------------------------------------------------------------------------------------------------------------------------------------------------------------------------------------------------------------------------------------------------------------------------------------------------------------------------------------------------------------------------------------------------------------|----------------------------------------------------------------------------------------------------|----------------------|
| A Pan et al, 2011 | Meta-analysis combined with 3 cohort studies | 3 cohort studies + 1 meta analysis | meta-analysis (442,101 participants and 28,228 diabetes cases) | Evaluated the association between unprocessed and processed red meat consumption and incident T2D in US adults | Documented 13,759 incident T2D cases. Both unprocessed and processed red meat intakes were positively associated with T2D risk in each cohort (all P-trend <0.001). The pooled HRs (95% CIs) for a one serving/d increase in unprocessed, processed, and total red meat consumption were 1.12, 1.32, and 1.14, respectively. The results were confirmed by a meta-analysis: the RRs (95% CIs) were 1.19 and 1.51 for 100 g unprocessed red meat and for 50 g processed red meat, respectively. | Red meat consumption, particularly processed red meat, is associated with an increased risk of T2D | High                 |

|                         |                                                                     |                  |                                                                                                                                                                                        |                                                                                                                                               |                                                                                                                                                                                                                                                                                                                                                                                    |                                                                                                                                                                                                                                        |      |
|-------------------------|---------------------------------------------------------------------|------------------|----------------------------------------------------------------------------------------------------------------------------------------------------------------------------------------|-----------------------------------------------------------------------------------------------------------------------------------------------|------------------------------------------------------------------------------------------------------------------------------------------------------------------------------------------------------------------------------------------------------------------------------------------------------------------------------------------------------------------------------------|----------------------------------------------------------------------------------------------------------------------------------------------------------------------------------------------------------------------------------------|------|
| A Pan et al, 2011       | Meta-analysis combined with 3 cohort studies                        | 3 cohort studies | 26,357 men in the Health Professionals Follow-up Study (1986-2006), 48,709 women in the Nurses' Health Study (1986-2006), and 74,077 women in the Nurses' Health Study II (1991-2007). | Evaluate the association between changes in red meat consumption during a 4-year period and subsequent 4-year risk of T2DM in US adults       | Documented 7540 incident T2DM cases. Compared with the reference group of no change in red meat intake, increasing red meat intake of more than 0.50 servings per day was associated with a 48% elevated risk. Reducing red meat consumption by more than 0.50 servings per day from baseline to the first 4 years of follow-up was associated with a 14% lower risk               | Increasing red meat consumption over time is associated with an elevated subsequent risk of T2DM, and the association is partly mediated by body weight. Limiting red meat consumption over time confers benefits for T2DM prevention. | High |
| Sanders L.M et al, 2022 | Systematic review and meta-analysis of randomized controlled trials | 21 RCTs          | Adult humans (≥18 y of age)                                                                                                                                                            | Evaluating the effects of diets containing red meat compared to diets with lower or no red meat, on markers of glucose homeostasis in adults. | Compared to diets with reduced or no red meat intake, there was no significant impact of red meat intake on insulin sensitivity, insulin resistance, fasting glucose, fasting insulin, glycated hemoglobin, pancreatic beta-cell function, or glucagon-like peptide-1. Red meat intake modestly reduced postprandial glucose compared to meals with reduced or no red meat intake. | The results suggest red meat intake does not impact most glycemic and insulinemic risk factors for T2D. Further investigations are needed on other markers of glucose homeostasis.                                                     | High |

|                    |                       |                                                                                                        |                                                                                                                                             |           |                                                                                                                          |                                                                                                                                                                                                                                                                                                                                                                     |                                                                                                                                                                                    |
|--------------------|-----------------------|--------------------------------------------------------------------------------------------------------|---------------------------------------------------------------------------------------------------------------------------------------------|-----------|--------------------------------------------------------------------------------------------------------------------------|---------------------------------------------------------------------------------------------------------------------------------------------------------------------------------------------------------------------------------------------------------------------------------------------------------------------------------------------------------------------|------------------------------------------------------------------------------------------------------------------------------------------------------------------------------------|
| Nguyen et al, 2022 | Cross-sectional study | 3000 subjects,, aged 40-60 years, living in rural communes in Khánh Hòa Province for at least 6 months | Anthropometry results, blood samples for biochemical measurements and questionnaire information via face-to-face interviews were collected. | 2-4 years | Examine the association between daily consumption of red/processed meat (0-99 g, 100-199 g or $\geq 200$ g) and preDM/DM | The relative-risk ratios for DM were 1.00 (reference), 1.11 (95 % CI = 0.75, 1.62) and 1.80 (95 % CI = 1.40, 2.32) from the lowest to the highest red/processed meat consumption categories ( $P_{trend} = 0.006$ ). The corresponding values for preDM were 1.00 (reference), 1.25 (95 % CI = 1.01, 1.54) and 1.67 (95 % CI = 1.20, 2.33) ( $P_{trend} = 0.004$ ). | Increased red/processed meat consumption, but not poultry consumption, was positively associated with the prevalence of preDM/DM in rural communes in Khánh Hòa Province, Vietnam. |
|--------------------|-----------------------|--------------------------------------------------------------------------------------------------------|---------------------------------------------------------------------------------------------------------------------------------------------|-----------|--------------------------------------------------------------------------------------------------------------------------|---------------------------------------------------------------------------------------------------------------------------------------------------------------------------------------------------------------------------------------------------------------------------------------------------------------------------------------------------------------------|------------------------------------------------------------------------------------------------------------------------------------------------------------------------------------|

|                  |                          |                                                                                                                                           |                                                          |           |                                                                                                |                                                                                                                                                                                                                                                                                                                                                                                                                                                                   |                                                                                                                                     |
|------------------|--------------------------|-------------------------------------------------------------------------------------------------------------------------------------------|----------------------------------------------------------|-----------|------------------------------------------------------------------------------------------------|-------------------------------------------------------------------------------------------------------------------------------------------------------------------------------------------------------------------------------------------------------------------------------------------------------------------------------------------------------------------------------------------------------------------------------------------------------------------|-------------------------------------------------------------------------------------------------------------------------------------|
| Song et al, 2004 | Prospective cohort study | 37,309 participants in the Women's Health Study aged $\geq 45$ years who were free of cardiovascular disease, cancer, and type 2 diabetes | Validated semiquantitative food frequency questionnaire. | 8.8 years | To prospectively assess the relation between red meat intake and incidence of type 2 diabetes. | It was documented 1,558 incident cases of type 2 diabetes and it was found positive associations between intakes of red meat and processed meat and risk of type 2 diabetes. Comparing women in the highest quintile with those in the lowest quintile, the multivariate-adjusted relative risks (RRs) of type 2 diabetes were 1.28 for red meat (95% CI 1.07-1.53, $P < 0.001$ for trend) and 1.23 for processed meat intake (1.05-1.45, $P = 0.001$ for trend). | Higher consumption of total red meat, especially various processed meats, may increase risk of developing type 2 diabetes in women. |
|------------------|--------------------------|-------------------------------------------------------------------------------------------------------------------------------------------|----------------------------------------------------------|-----------|------------------------------------------------------------------------------------------------|-------------------------------------------------------------------------------------------------------------------------------------------------------------------------------------------------------------------------------------------------------------------------------------------------------------------------------------------------------------------------------------------------------------------------------------------------------------------|-------------------------------------------------------------------------------------------------------------------------------------|
