# Supplementary material for: A Narrative Review on Strategies for the Reversion of Prediabetes to Normoglycemia: Food Pyramid, Physical Activity, and Self-Monitoring Innovative Glucose Devices
Source: MDPI journal article supplement (doi:10.3390/nu15234943), 2023-11-28
Supplement: s1 [file s1]

| Authors                     | Type of study            | Population characteristics                                               | Type of intervention                                                                                                                      | Duration  | End point                                                                                                                                | Results                                                                                                                                                                                                                                                                                   | Conclusion                                                                                                                               | Strength of evidence |
|-----------------------------|--------------------------|--------------------------------------------------------------------------|-------------------------------------------------------------------------------------------------------------------------------------------|-----------|------------------------------------------------------------------------------------------------------------------------------------------|-------------------------------------------------------------------------------------------------------------------------------------------------------------------------------------------------------------------------------------------------------------------------------------------|------------------------------------------------------------------------------------------------------------------------------------------|----------------------|
| Becerra-Tomás N et al, 2017 | Prospective cohort study | 3349 participants without type 2 diabetes at baseline. Aged 55-80 years. | -                                                                                                                                         | 4.3 years | Examine the associations between consumption of total legumes and specific subtypes, and type 2 diabetes risk.                           | 266 new cases of type 2 diabetes. Individuals in the highest quartile of total legume and lentil consumption had a lower risk of diabetes than those in the lowest quartile (HR: 0.65; 95% CI: 0.43, 0.96; P-trend = 0.04; and HR: 0.67; 95% CI: 0.46-0.98; P-trend = 0.05, respectively) | A frequent consumption of legumes, particularly lentils, may provide benefits on type 2 diabetes prevention in older adults              | Moderate             |
| Shams H. et al, 2008        | Case control study       | 30 patients with type 2 diabetes mellitus                                | 2 groups.<br>Group A normal diet<br>Group B normal diet with 50g cooked lentil and 6g canola oil (substitute of 30g bread and 20g cheese) | 6 weeks   | Assess the effects of cooked lentil on serum blood glucose and lipid profile among type 2 diabetic patients                              | Total cholesterol and fasting blood glucose decreased significantly in regimen containing lentils (P<0.05)                                                                                                                                                                                | Consumption of cooked lentil in breakfast led to reduction of FBS and TC and improvement of glycemic control in type 2 diabetic patients | Moderate             |
| Kwak JH et al, 2010         | RCT                      | 42 prediabetic or diabetic subjects                                      | Subjects with prediabetes and type 2 DM .<br>Black soy peptide intervention group or placebo control group                                | 12 week   | Effect of black soy peptide supplementation on glucose control in subjects with prediabetes and newly diagnosed type 2 diabetes mellitus | Subjects with fasting glucose $\geq$ 110 mg/dL who consumed black soy peptides tended to have lower fasting glucose levels (two-tailed test, P = .098; one-tailed test, P = .049) and had a significant reduction in 2-hour PG level (two-tailed P = .012, one-tailed P = .006), compared | Black soy peptide supplementation may be beneficial for controlling fasting blood glucose levels and 2-hour PG levels                    | High                 |

|                     |                          |                                                                                             |                                                                                                                                                                                                                |          |                                                                                                 |                                                                                                                                                                                                                                                           |                                                                                                                                                  |          |
|---------------------|--------------------------|---------------------------------------------------------------------------------------------|----------------------------------------------------------------------------------------------------------------------------------------------------------------------------------------------------------------|----------|-------------------------------------------------------------------------------------------------|-----------------------------------------------------------------------------------------------------------------------------------------------------------------------------------------------------------------------------------------------------------|--------------------------------------------------------------------------------------------------------------------------------------------------|----------|
|                     |                          |                                                                                             |                                                                                                                                                                                                                |          |                                                                                                 | with baseline levels. The changes in 2-hour PG levels were also statistically significant in the intervention group ( $-41.25 \pm 13.67$ mg/dL) compared with the placebo group ( $12.42 \pm 9.80$ mg/dL; two-tailed $P = .015$ , one-tailed $P = .008$ ) |                                                                                                                                                  |          |
| Jiang R et al, 2002 | Prospective cohort study | 83 818 women, aged 34 to 59 years, no history of diabetes, cardiovascular disease or cancer | Subjects completed a validated dietary questionnaire at baseline in 1980, and were followed up for 16 years.                                                                                                   | 16 years | Examine prospectively the relationship between nut consumption and risk of type 2 diabetes.     | 3206 new cases of type 2 diabetes were documented. The consumption was inversely associated with risk of type 2 diabetes.                                                                                                                                 | A higher consumption of nut and peanut butter may have some benefits in lowering risk of type 2 diabetes in women                                | Moderate |
| Reis CE et al, 2011 | RCT                      | 13 subjects (4 men and 9 women), with a mean age of $28.5 \pm 10$ years                     | 4 types of test meals were consumed: raw peanuts with skin (RPS), roasted peanuts without skin, ground-roasted peanuts without skin (GRPWS) or control meal. The test meals had the same nutrient composition. | 24h      | Evaluate the effect of peanut processing on glycemic response, and energy and nutrients intake. | The area under the glycemic response curve after GRPWS was lower ( $p = 0.02$ ) the one obtained for RPS. There was no treatment effect on energy intake, macronutrients and fiber consumption                                                            | The consumption of ground-roasted peanuts may favor the control and prevention of diabetes due to its reduction on postprandial glucose response | High     |

## Review and meta-analysis

| Authors                           | Type of study    | Number of studies                                          | Subjects (total)                              | End point                                                                                                                                                                                                                                                         | Result                                                                                                                                                                                                                                                                                                                        | Conclusion                                                                                                                          | Strenght of evidence |
|-----------------------------------|------------------|------------------------------------------------------------|-----------------------------------------------|-------------------------------------------------------------------------------------------------------------------------------------------------------------------------------------------------------------------------------------------------------------------|-------------------------------------------------------------------------------------------------------------------------------------------------------------------------------------------------------------------------------------------------------------------------------------------------------------------------------|-------------------------------------------------------------------------------------------------------------------------------------|----------------------|
| Ley SH et al, 2014                | Narrative review | -                                                          | -                                             | To examine the role of diet in prevention and management of diabetes in the scientific literature                                                                                                                                                                 | -                                                                                                                                                                                                                                                                                                                             | -                                                                                                                                   | Low                  |
| Kim Y, Keogh JB, Clifton PM, 2016 | Narrative review | -                                                          | -                                             | To provide a comprehensive overview of the anti-diabetic effects of commonly consumed dietary polyphenols                                                                                                                                                         | In vitro and in vivo studies have shown that dietary polyphenolic compounds improved glucose homeostasis in the intestine, liver, muscle adipocytes and pancreatic $\beta$ -cells, as well as through prebiotic effects in the digestive tract.                                                                               | Polyphenols may play a role in diabetes treatment and prevention but further investigations are needed                              | Low                  |
| Schwingshackl L et al, 2018       | Meta-analysis    | 66 randomized trials (86 reports) comparing 10 food groups | 3595 participants                             | To assess the effects of main food groups (refined grains, whole grains, nuts, legumes, fruits and vegetables, eggs, dairy, fish, red meat, and sugar-sweetened beverages) on intermediate-disease markers across randomized intervention trials                  | Legumes, but also whole grains, nuts, and refined grains, were more effective at reducing HOMA-IR ( $-1.01$ to $-0.53$ ) compared with eggs and dairy. No significant effects were detected for HbA1c                                                                                                                         | Increased intake of legumes (but also nuts and whole grains) is more effective at improving metabolic health than other food groups | High                 |
| Schwingshackl L et al, 2017       | Meta-analysis    | 103 studies where included in the meta-analysis            | -                                             | Synthesize the knowledge about the relation between intake of 12 major food groups (whole grains, refined grains, vegetables, fruits, nuts, legumes, eggs, dairy, fish, red meat, processed meat, and sugar-sweetened beverages) with risk of all-cause mortality | An inverse association was observed for the highest compared with lowest legume intake categories (RR: 0.96; 95% CI: 0.93, 1.00; $I^2 = 48\%$ ; P-heterogeneity = 0.01). Consumption of legumes was associated with a decreased by 16% risk of all-cause mortality with increasing intake of legumes up to 150 g daily intake | Legumes intake up to 150 g/d may be helpful in reducing mortality for all causes (including diabetes and its complications)         | High                 |
| Tang J et al, 2020                | Meta-analysis    | 15 cohort studies                                          | 565,810 individuals and 32,093 incident cases | Summarize the longitudinal associations between legume and soy intake and risk of type 2 diabetes.                                                                                                                                                                | In dose–response analysis, significant linear inverse associations were observed for tofu, soy protein, and soy                                                                                                                                                                                                               | Dietary intakes of tofu, soy protein, and soy isoflavones, but not total legumes or total soy, are inversely                        | High                 |

|                  |               |                                     |                           |                                                                                      |                                                                                                                                                                                                                                                                                                                                                                                                |                                                                                                                                                  |      |
|------------------|---------------|-------------------------------------|---------------------------|--------------------------------------------------------------------------------------|------------------------------------------------------------------------------------------------------------------------------------------------------------------------------------------------------------------------------------------------------------------------------------------------------------------------------------------------------------------------------------------------|--------------------------------------------------------------------------------------------------------------------------------------------------|------|
|                  |               |                                     | (diabetes<br>occurrences) |                                                                                      | isoflavones (all $P < 0.05$ ).<br>Overall quality of evidence<br>was rated as moderate for<br>total legumes and low for<br>total soy and soy subtypes.                                                                                                                                                                                                                                         | associated with incident<br>type 2 diabetes                                                                                                      |      |
| Li W et al, 2018 | Meta-analysis | Eight studies<br>with 19<br>reports | 335230<br>participants    | Evaluate the relationship<br>between soy intake and type<br>2 diabetes mellitus risk | A significant inverse<br>association was shown<br>between soy intake and type<br>2 diabetes mellitus risk with<br>an overall RR of 0.77 (95% CI<br>= 0.66-0.91) with high<br>heterogeneity. Besides, there<br>was an obvious relationship<br>between soy protein and<br>isoflavones intake and risk of<br>T2DM with the summary RR<br>was 0.88 (95% CI = 0.80-<br>0.97) with no heterogeneity. | Soy products and soy<br>constituents (soy protein<br>and soy isoflavones) may be<br>associated with a lower risk<br>of type 2 diabetes mellitus. | High |
