# Supplementary material for: A Narrative Review on Strategies for the Reversion of Prediabetes to Normoglycemia: Food Pyramid, Physical Activity, and Self-Monitoring Innovative Glucose Devices
Source: MDPI journal article supplement (doi:10.3390/nu15234943), 2023-11-28
Supplement: s1 [file s1]

| Authors             | Type of study            | Population characteristics                    | Type of intervention             | Duration | End point                                                                                                  | Results                                                                                                                                                                                                   | Conclusion                                                                              | Strength of evidence |
|---------------------|--------------------------|-----------------------------------------------|----------------------------------|----------|------------------------------------------------------------------------------------------------------------|-----------------------------------------------------------------------------------------------------------------------------------------------------------------------------------------------------------|-----------------------------------------------------------------------------------------|----------------------|
| Barouti et al, 2022 | Cohort prospective study | 6961 men and women, aged between 35 and 56    | Questionnaire for diet assesment | 20 years | To establish a relationship between consumption of fruit and vegetables and the development of disglycemia | An inverse relationship was seen between fruit and vegetable consumption and the development of a disglycemia                                                                                             | Increasing fruits and vegetables in the diet reduces the risk of disglycemia (HR: 0,86) | High                 |
| Li et al, 2023      | Cohort prospective study | 79,922 patients aged over 40 years            | Questionnaire for diet assesment | 4 years  | To establish a relationship between consumption of fruit and vegetables and the development of disglycemia | The risk of development of disglycemia decreased especially in normoglycemic patients in whom the consumption of more than 7 portions of fruit per week decreased the risk of developing diabetes by 48%. | Increasing fruits and vegetables in the diet reduces the risk of disglycemia            | High                 |
| Wu et al, 2021      | Cross-sectional study    | 6802 participants between 18 and 65 years old | Questionnaire for diet assesment |          | To establish a relationship between diet and the development of DM2 or IFG                                 | A reduction in the risk of prediabetes was seen with a consumption of fruit and vegetables corresponding to the third and fourth quartile, i.e. between 320 and 530 grams (vegetables + fruit/day).       | Increasing fruits and vegetables in the diet reduces the risk of disglycemia            | High                 |

|                            |                          |                                                                                                   |                                                                                                |                    |                                                                                        |                                        |                                                                                                                                                                                                             |      |
|----------------------------|--------------------------|---------------------------------------------------------------------------------------------------|------------------------------------------------------------------------------------------------|--------------------|----------------------------------------------------------------------------------------|----------------------------------------|-------------------------------------------------------------------------------------------------------------------------------------------------------------------------------------------------------------|------|
| Zhang et al, 2022          | Cohort prospective study | 18,085 participants who at baseline had neither diabetes nor prediabetes or other CVD nor cancer. | Questionnaire for diet assesment                                                               | 63175 person-years | To establish a relationship between the consumption of fibre and DM2 or IFG            | 4139 cases of diabetes occurred.       | Fiber intake was inversely related to the incidence of prediabetes. The type of fiber that was found to be most effective in preventing prediabetes is soluble fiber, mostly found in fruit and vegetables. | High |
| Lopez Ridarura et al, 2004 | Cohort prospective study | 85,060 women and 42,872 men                                                                       | Magnesium intake was evaluated using a validated food frequency questionnaire every 2-4 years. | 18 years           | To establish if magnesium intake could reduce the risk of developing diabetes mellitus | Magnesium reduces the risk of diabetes | The results of this study confirmed the inverse association between magnesium intake and diabetes risk                                                                                                      | High |

Review and meta-analysis

| Authors            | Type of study                                                     | Number of studies                                                                     | Subjects (total)     | End point                                                                                              | Result                                                                                                                           | Conclusion                                                                                                        | Strenght of evidence |
|--------------------|-------------------------------------------------------------------|---------------------------------------------------------------------------------------|----------------------|--------------------------------------------------------------------------------------------------------|----------------------------------------------------------------------------------------------------------------------------------|-------------------------------------------------------------------------------------------------------------------|----------------------|
| Min Li et al, 2014 | Meta-analysis and systematic review of prospective cohort studies | A total of 10 articles including 13 comparisons with 24,013 cases of type 2 diabetes. | 434,342 participants | To assess the relationship between fruit and vegetable consumption and the risk of developing diabetes | Evidence of curve linear associations was seen between fruit and green leafy vegetables consumption and risk of type 2 diabetes. | Higher fruit or green leafy vegetables intake is associated with a significantly reduced risk of type 2 diabetes. | HIGH                 |
