# Supplementary material for: A Narrative Review on Strategies for the Reversion of Prediabetes to Normoglycemia: Food Pyramid, Physical Activity, and Self-Monitoring Innovative Glucose Devices
Source: MDPI journal article supplement (doi:10.3390/nu15234943), 2023-11-28
Supplement: s1 [file s1]

| Authors              | Type of study         | Population characteristics                                                                                                                      | Type of intervention                                                                                                                     | Duration | End point                                                                                                | Results                                                                                                                                                                                                                                                                                                                                                                                          | Conclusion                                                                                                                                  | Strength of evidence |
|----------------------|-----------------------|-------------------------------------------------------------------------------------------------------------------------------------------------|------------------------------------------------------------------------------------------------------------------------------------------|----------|----------------------------------------------------------------------------------------------------------|--------------------------------------------------------------------------------------------------------------------------------------------------------------------------------------------------------------------------------------------------------------------------------------------------------------------------------------------------------------------------------------------------|---------------------------------------------------------------------------------------------------------------------------------------------|----------------------|
| Xu J. et al., 2023   | Population study      | 16,116 U.S. adults aged 20-59 y with dual energy X-ray absorptiometry (DXA) from the National Health and Nutrition Examination Surveys (NHANES) | evaluation of sarcopenia by DXA                                                                                                          | //       | To explore the specific association between sarcopenia and prediabetes based on large population samples | Sarcopenia was strongly associated with an increased risk of prediabetes after full adjustment (OR = 1.21, 95CI%: 1.05, 1.39, P = 0.009).                                                                                                                                                                                                                                                        | Sarcopenia was positively associated with prevalent prediabetes, especially IGT in the non-elderly.                                         | Moderate             |
| Kaga H. et al., 2022 | Cross-sectional study | 1629 elderly (mean age 73.1 ± 5.4 years) living in Japan                                                                                        | Evaluation of glucose metabolism (75-g oral glucose tolerance test and glycated haemoglobin) and sarcopenia (BIA and hand grip strength) | //       | To examine the relationship between sarcopenia and prediabetes                                           | Prediabetes and diabetes are independent risk factors for sarcopenia in men (prediabetes, odds ratio [OR] = 2.081 [95% confidence interval {CI}: 1.031–4.199]; diabetes, OR = 2.614 [95% CI: 1.362–5.018]) and diabetes, but not prediabetes, is an independent risk factor for sarcopenia in women (prediabetes, OR = 1.036 [95% CI: 0.611–1.757]; diabetes, OR = 2.099 [95% CI: 1.146–3.844]). | Although diabetes mellitus is associated with sarcopenia in both sexes, prediabetes is associated with sarcopenia in men, but not in women. | Moderate             |

|                       |                     |                                                                                                |                                                                                                                            |    |                                                                         |                                                                                                                                                                                                                                                                                           |                                                                                                                                                                                                                              |          |
|-----------------------|---------------------|------------------------------------------------------------------------------------------------|----------------------------------------------------------------------------------------------------------------------------|----|-------------------------------------------------------------------------|-------------------------------------------------------------------------------------------------------------------------------------------------------------------------------------------------------------------------------------------------------------------------------------------|------------------------------------------------------------------------------------------------------------------------------------------------------------------------------------------------------------------------------|----------|
| Li S. et al.,<br>2023 | Observational study | 22,482 adults aged ≥ 20 years in the National Health and Nutrition Examination Survey (NHANES) | Sarcopenia defined as ASMBMI (appendicular skeletal muscle mass/body mass index) < 0.789 for males, and <0.512 for females | // | To explore the detailed correlation between pre-diabetes and sarcopenia | Sarcopenia was directly correlated with pre-diabetes [OR (95%CI) = 1.230 (1.057, 1.431), p = 0.008] and T2DM [OR (95%CI) = 2.106 (1.625, 2.729), p < 0.001]. In non-T2DM population, HbA1c was negatively correlated with ASMBMI [ $\beta$ (95%CI) = -0.009 (-0.013, -0.005), p < 0.001]. | Pre-diabetes is associated with increased risk of sarcopenia. HbA1c is an independent risk factor for loss of appendicular skeletal muscle mass and sarcopenia when HbA1c greater than 5.2% in the male non-T2DM population. | Moderate |
|-----------------------|---------------------|------------------------------------------------------------------------------------------------|----------------------------------------------------------------------------------------------------------------------------|----|-------------------------------------------------------------------------|-------------------------------------------------------------------------------------------------------------------------------------------------------------------------------------------------------------------------------------------------------------------------------------------|------------------------------------------------------------------------------------------------------------------------------------------------------------------------------------------------------------------------------|----------|

Review and meta-analysis

| Authors                   | Type of study | Number of studies        | Subjects (total) | End point                                                                                                                       | Result                                                                                                                                                                                                                                                                                                                                                                                                                   | Conclusion                                                                                             | Strenght of evidence |
|---------------------------|---------------|--------------------------|------------------|---------------------------------------------------------------------------------------------------------------------------------|--------------------------------------------------------------------------------------------------------------------------------------------------------------------------------------------------------------------------------------------------------------------------------------------------------------------------------------------------------------------------------------------------------------------------|--------------------------------------------------------------------------------------------------------|----------------------|
| Qiao Y.S. et al.,<br>2021 | Meta-analysis | 16 observational studies | //               | To investigate the association between the presence of sarcopenia and HbA1c values, prediabetes, diabetes and its complications | Three studies showed that high HbA1c levels lead to loss of muscle mass, and one study showed that people with prediabetes had lower muscle mass, strength, and performance than non-diabetic population. Seven studies showed that people with diabetes had a higher risk of sarcopenia than those without diabetes. The remaining five studies suggested that diabetic complications increased the risk of sarcopenia. | Subjects with prediabetes had reduced mass, strength and muscle performance compared to non-diabetics. | HIGH                 |
|                           |               |                          |                  |                                                                                                                                 |                                                                                                                                                                                                                                                                                                                                                                                                                          |                                                                                                        |                      |
