# Supplementary material for: A Narrative Review on Strategies for the Reversion of Prediabetes to Normoglycemia: Food Pyramid, Physical Activity, and Self-Monitoring Innovative Glucose Devices
Source: MDPI journal article supplement (doi:10.3390/nu15234943), 2023-11-28
Supplement: s1 [file s1]

| Authors              | Type of study               | Population characteristics                               | Type of intervention                                                                                                           | Duration | End point                                                                                     | Results                                                                                                                                         | Conclusion                                                                 | Strength of evidence |
|----------------------|-----------------------------|----------------------------------------------------------|--------------------------------------------------------------------------------------------------------------------------------|----------|-----------------------------------------------------------------------------------------------|-------------------------------------------------------------------------------------------------------------------------------------------------|----------------------------------------------------------------------------|----------------------|
| Rochitte et al, 2014 | Case control study          | T205 people healthy males between the ages of 50 and 75. | two groups of people were retrospectively compared, 101 people drinking red wine and 104 with complete abstinence from alcohol | 5 years  | To evaluate the effects of red wine on glycometabolic patterns                                | Drinking one glass of red wine a day has led to better glycometabolic parameters                                                                | Drinking one glass of red wine is beneficial in preventing T2DM            | Moderate             |
| Blomster et al,      | Prospective cohort study    | 11140 people with type 2 diabetes mellitus               | To define groups based on their alcohol consumption                                                                            | 5 years  | To establish the risk of complications in people with different levels of alcohol consumption | Those who consumed moderate alcohol saw a reduction in cardiovascular events, fewer microvascular complications and reduced all-cause mortality | Moderate alcohol consumption is beneficial for all cause mortality         | Moderate             |
| Gepner et al, 2015   | Randomized controlled trial | 224 subjects                                             | 3 groups: one group to drink 150 ml of mineral water at dinner, another 150 ml of white wine and finally 150 ml of red wine.   | 2 years  | To establish any effects of wine on metabolic and diabetes blood markers                      | No significant differences among groups, except for red wine which can reduce the risk of metabolic syndrome                                    | Red wine in moderate consumption can reduce the risk of metabolic syndrome | High                 |

|                        |                                  |                                                                                     |                                                                                       |                      |                                                                                                                     |                                                                                                                                                 |                                                                                                                 |          |
|------------------------|----------------------------------|-------------------------------------------------------------------------------------|---------------------------------------------------------------------------------------|----------------------|---------------------------------------------------------------------------------------------------------------------|-------------------------------------------------------------------------------------------------------------------------------------------------|-----------------------------------------------------------------------------------------------------------------|----------|
| Li et al, 2022         | Cohort study                     | 15726 participants                                                                  | Groups based on daily alcohol consumption                                             | 4 years              | To assess the association between the average consumption of alcohol with the incidence of type 2 diabetes mellitus | Occasional or moderate alcohol use was not associated with risk of hyperglycemia, while high consumption increased the incidence of dysglycemia | High alcohol consumption is detrimental, while moderate consumption is not associated with risk of dysglycaemia | Moderate |
| Cullman et al, 2011    | Cohort study                     | 2070 men and 3058 women with normiglycemia and 70 men and 41 women with prediabetes | Groups based on alcohol consumption in quantity and quality                           | 8-10 years follow-up | To evaluate the effect on glicometabolic patterns of different types and dosages of alcoholic beverages             | Both women and men had higher risk with heavy alcohol consumption                                                                               | Heavy alcohol consumption is detrimental for both sexes                                                         | Moderate |
| Suebsamran et al, 2016 | Cross sectional analytical study | 383442 patients                                                                     | Enrolled were divided into 6 different groups based on the amount of alcohol consumed |                      | Relationship between alcohol consumption and prediabetes                                                            | After adjustment for other risk factors, alcohol consumption was independently associated with pre-diabetes, with dose-response relationship    | The more the alcohol consumption, the more the risk of prediabetes                                              | Moderate |

Review and meta-analysis

| <b>Authors</b>     | <b>Type of study</b> | <b>Number of studies</b> | <b>Subjects (total)</b> | <b>End point</b>                                                            | <b>Result</b>                                                                                                                          | <b>Conclusion</b>                                                              | <b>Strenght of evidence</b> |
|--------------------|----------------------|--------------------------|-------------------------|-----------------------------------------------------------------------------|----------------------------------------------------------------------------------------------------------------------------------------|--------------------------------------------------------------------------------|-----------------------------|
| Bajuna et al, 2009 | Metanalysis          | 20 cohort studies        | 477,200 individuals     | To establish a relationship between alcohol consumption and diabetes type 2 | Our analysis confirms previous research findings that moderate alcohol consumption is protective for type 2 diabetes in men and women. | Moderate alcohol consumption is beneficial for preventing the risk of diabetes | High                        |
