# Supplementary material for: A Narrative Review on Strategies for the Reversion of Prediabetes to Normoglycemia: Food Pyramid, Physical Activity, and Self-Monitoring Innovative Glucose Devices
Source: Nutrients. 2023 Nov 28;15(23):4943. doi: 10.3390/nu15234943 (PMC10707766; doi:10.3390/nu15234943)
Supplement: Supplementary file 1 [file nutrients-15-04943-s001.zip]

Archive with 19 entries (19 files):
- Tables Prediabetes Nutrients/1 Tabelle CHO.pdf
- Tables Prediabetes Nutrients/10a Tabelle Plain water.pdf
- Tables Prediabetes Nutrients/10b Tabelle Sugary beverages.pdf
- Tables Prediabetes Nutrients/11 Tabella Alcohol.pdf
- Tables Prediabetes Nutrients/12 Tabella Coffee.pdf
- Tables Prediabetes Nutrients/13 Tabelle Physical activity.pdf
- Tables Prediabetes Nutrients/14 tabelle Microbiota.pdf
- Tables Prediabetes Nutrients/15 Tabelle Monitoring Glucose Levels.pdf
- Tables Prediabetes Nutrients/2a Tabelle Milk and Dairy.pdf
- Tables Prediabetes Nutrients/2b Tabelle Eggs.pdf
- Tables Prediabetes Nutrients/2c Tabelle Meat.pdf
- Tables Prediabetes Nutrients/2d Tabelle Plant-Based Proteins.pdf
- Tables Prediabetes Nutrients/3 Tabelle sarcopenia.pdf
- Tables Prediabetes Nutrients/4 Tabelle Lipid.pdf
- Tables Prediabetes Nutrients/5 Tabelle Vitamins.pdf
- Tables Prediabetes Nutrients/6 Tabella Minerals.pdf
- Tables Prediabetes Nutrients/7 Tabelle Osteoporosis.pdf
- Tables Prediabetes Nutrients/8 Tabella Fruits and vegetables.pdf
- Tables Prediabetes Nutrients/9 Tabella Nuts.pdf
